# Supplementary material
Source: Springer Nature journal article supplement (https://www.springermedizin.de/resource/supplementary/13045_2012_213_MOESM3_ESM.pdf/9660874)

LNCaP

PC-3

DU-145

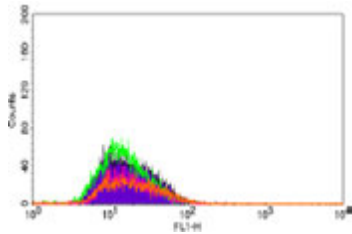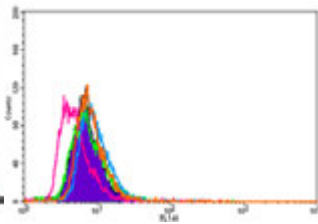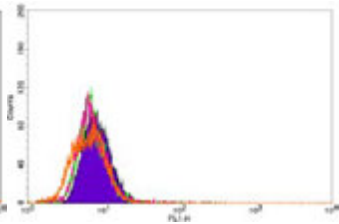

————— FITC-dUTP —————>

Supplement: MOESM3 [file 9660874]
